# Supplementary material
Source: MDPI journal article supplement (https://www.mdpi.com/2071-1050/13/23/12985)
Supplement: s1 [file s1 › sustainability-1414877-SI.pdf]

**Table S1.** Construct and measurement items

| Construct and Items                                                                                                                                                    | Sources              |
|------------------------------------------------------------------------------------------------------------------------------------------------------------------------|----------------------|
| Environmental Concerns (EC)                                                                                                                                            |                      |
| EC1. I am extremely worried about the serious resource waste caused without garbage classification and what it means for my future.                                    |                      |
| EC2. I am extremely worried about the disastrous consequences caused without garbage classification and what it means for my future.                                   | [16, 49-51, 79]      |
| EC3. The balance of nature is very delicate and easily upset.                                                                                                          |                      |
| EC4. Earth is like a space station with limited room and resources.                                                                                                    |                      |
| EC5. Garbage classification promotes resources recycling and helps humans live in harmony with the environment.                                                        |                      |
| Moral norm (MN)                                                                                                                                                        |                      |
| MN1. I am the kind of person who would like to participate in garbage classification behavior because of the increasing environmental pollution and resource shortage. |                      |
| MN2. I would feel guilty if I did not participate in garbage classification behavior in my daily life.                                                                 | [22, 24, 46, 79]     |
| MN3. I feel morally obligated to participate in garbage classification behavior in my daily life.                                                                      |                      |
| MN4. Participating in garbage classification behavior goes along with my principles of environmental protection.                                                       |                      |
| Attitudes toward garbage classification (AT)                                                                                                                           |                      |
| AT1. Participating in garbage classification is a wise behavior.                                                                                                       |                      |
| AT2. Participating in garbage classification is a beneficial behavior.                                                                                                 | [11, 14, 23, 26, 37] |
| AT3. Participating in garbage classification is an affirmative behavior.                                                                                               |                      |
| AT4. Participating in garbage classification behavior for resource recycling is useful.                                                                                |                      |
| Environmental Benefits (EB)                                                                                                                                            |                      |
| EB1. The implementation of garbage classification can reduce environmental pollution, i.e. avoid soil, air and water pollution.                                        |                      |
| EB2. The implementation of garbage classification will contribute to resource recycling in the near future.                                                            |                      |
| EB3. The implementation of garbage classification can effectively reduce human health risks in the near future.                                                        | [6, 9, 24, 29]       |
| EB4. Once garbage classification behavior is integrated into daily life, it will become an effective way to protect the environment.                                   |                      |
| EB5. The implementation of garbage classification can improve environmental quality in the near future.                                                                |                      |
| Subjective Norm (SN)                                                                                                                                                   |                      |
| SN1. Most people who are important to me think I should participate in garbage classification (e.g., families, friends, or neighbors, etc.).                           |                      |
| SN2. Most people who are important to me expect me to participate in garbage classification (e.g., families, friends, or neighbors, etc.).                             | [23, 37, 49, 79]     |
| SN3. I feel under social pressure to participate in garbage classification.                                                                                            |                      |

SN4. Most people who I admire participate in garbage classification (e.g., families, friends, or neighbors, etc.).

Perceived Behavioral Control (PBC)

PBC1. I have sufficient time to participate in garbage classification.

PBC2. I have enough energy to participate in garbage classification.

PBC3. I find it easy to participate in garbage classification.

PBC4. Whether I participate in garbage classification or not is completely up to me in my daily life.

[15, 33,  
34]

Expectancy toward garbage classification (Exp)

Exp1. I believe I have the knowledge to behave garbage classification.

Exp2. I believe I have the skills to behave garbage classification.

Exp3. I believe I am capable of adopting garbage classification behaviors.

Exp4. I believe I can be a role model to other people by behaving garbage classification.

[28, 33]

Intention to behave garbage classification (IB)

IB1. I would prefer to take the initiative to learn local garbage classification measures, i.e. garbage classification methods, standards and specific implementation measures.

IB2. I would try to reduce garbage generation in my daily life.

IB3. I would try to dispose of garbage properly, according to quartering method :  
A. Recyclable B. Harmful C. Kitchen/ perishable/wet waste D. Other/dry wastes.

IB4. I would voluntarily accept punishment when I do not sort my garbage, i.e. penalties or extra duty.

[24, 48]

IB5. I would try to teach my family, friends, or neighbors how to sort garbage in my daily life.

IB6. I would try to participate in popular science education activities which are related to garbage classification.

IB7. I would try to discourage behaving without garbage classification properly if possible.

---
